# Supplementary material for: SPAG11B, a potential biomarker for rheumatoid arthritis: A two-sample bidirectional mendelian randomization analysis
Source: Research Square preprint supplement (doi:10.21203/rs.3.rs-6248365/v1), 2025-04-22
Supplement: Supplementary file 1 [file f25e9f5d40706a10004a2700.docx]

**a**

**b**

**Figure S1.** Leave-one-out analysis of genetic IVs of SPAG11B (a) and DEFB135 (b) on RA.

**a**

**b**

**Figure S2.** Reverse MR analysis evaluated the effect of RA on the plasma level of SPAG11B (a). Leave-one-out analysis of genetic IVs of RA on SPAG11B (b).
