# Supplementary material for: SPAG11B, a potential biomarker for rheumatoid arthritis: A two-sample bidirectional mendelian randomization analysis
Source: Research Square preprint supplement (doi:10.21203/rs.3.rs-6248365/v1), 2025-04-22
Supplement: Supplementary file 2 [file fe08e1181aa755ba725dd846.xlsx]

## Sheet: Supplementary Table 1
Supplementary Table 1a Pleiotropy analysis of SPAG11B in IEU and UKB
outcome	exposure	egger_intercept	se	pval
ebi-a-GCST90013534	SPAG11B	0.126556	0.0612358	0.286895
ukb-d-M13_RHEUMA	SPAG11B	9.08036e-05	0.000417965	0.841949
Supplementary Table 1b Heterogeneity analysis of SPAG11B in IEU and UKB
outcome	exposure	method	Q	Q_df	Q_pval
ebi-a-GCST90013534	SPAG11B	Inverse variance weighted	48.5318	2	2.8937e-11
ukb-d-M13_RHEUMA	SPAG11B	Inverse variance weighted	8.49627	4	0.0750003

## Sheet: Supplementary Table 2
Supplementary Table 2 MR analysis estimated the association of DEFB135 with RA from IEU and UKB.
outcome	exposure	method	nsnp	b	se	pval	lo_ci	up_ci	or	or_lci95	or_uci95
ebi-a-GCST90013534	DEFB135	MR Egger	5	-0.968851	1.31104	0.513477	-3.53848	1.60078	0.379519	0.0290574	4.9569
ebi-a-GCST90013534	DEFB135	Weighted median	5	-0.593724	0.137587	1.59415e-05	-0.863395	-0.324053	0.552267	0.421728	0.723212
ebi-a-GCST90013534	DEFB135	Inverse variance weighted	5	-3.56605	2.14678	0.0966906	-7.77374	0.641644	0.0282673	0.000420636	1.8996
ukb-d-M13_RHEUMA	DEFB135	MR Egger	5	-0.00778406	0.00907705	0.454186	-0.0255751	0.010007	0.992246	0.974749	1.01006
ukb-d-M13_RHEUMA	DEFB135	Weighted median	5	-0.00598134	0.00168558	0.000387397	-0.00928508	-0.00267759	0.994037	0.990758	0.997326
ukb-d-M13_RHEUMA	DEFB135	Inverse variance weighted	5	-0.00543283	0.00293501	0.064163	-0.0111854	0.000319782	0.994582	0.988877	1.00032

## Sheet: Supplementary Table 3
Supplementary Table 3 Reverse MR analysis evaluated the effect of RA on the plasma level of DEFB135
exposure	outcome	method	nsnp	b	se	pval	lo_ci	up_ci	or	or_lci95	or_uci95
FinnGen_M13_RHEUMA	DEFB135	MR Egger	12	-0.0069967	0.019761	0.730642	-0.0457283	0.031735	0.993028	0.955301	1.03224
FinnGen_M13_RHEUMA	DEFB135	Weighted median	12	-0.00812605	0.0101322	0.422552	-0.0279852	0.0117331	0.991907	0.972403	1.0118
FinnGen_M13_RHEUMA	DEFB135	Inverse variance weighted	12	0.001067	0.0114771	0.925929	-0.0214281	0.0235621	1.00107	0.9788	1.02384
